# Supplementary figures and images for: Mutation in Hemagglutinin Antigenic Sites in Influenza A pH1N1 Viruses from 2015–2019 in the United States Mountain West, Europe, and the Northern Hemisphere
Source: MDPI journal article supplement (doi:10.3390/genes13050909), 2022-05-19

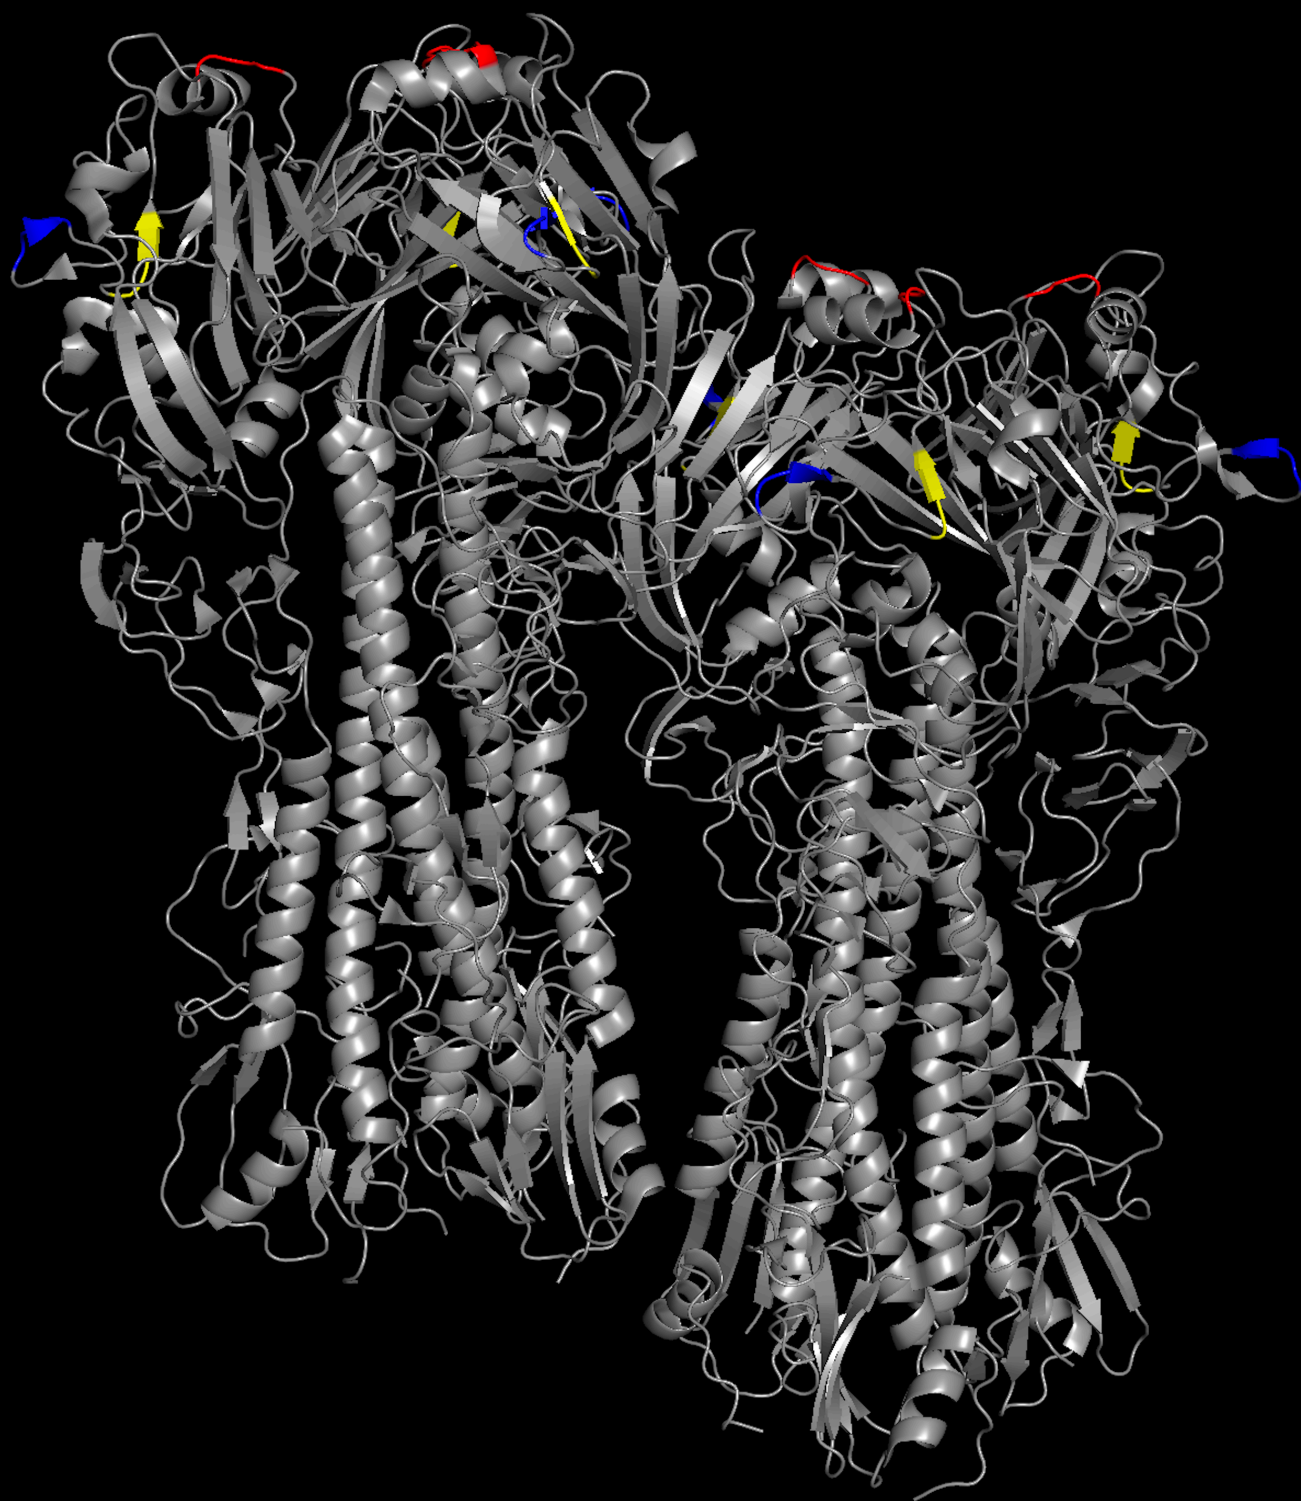

Supplement: s1 [file s1]

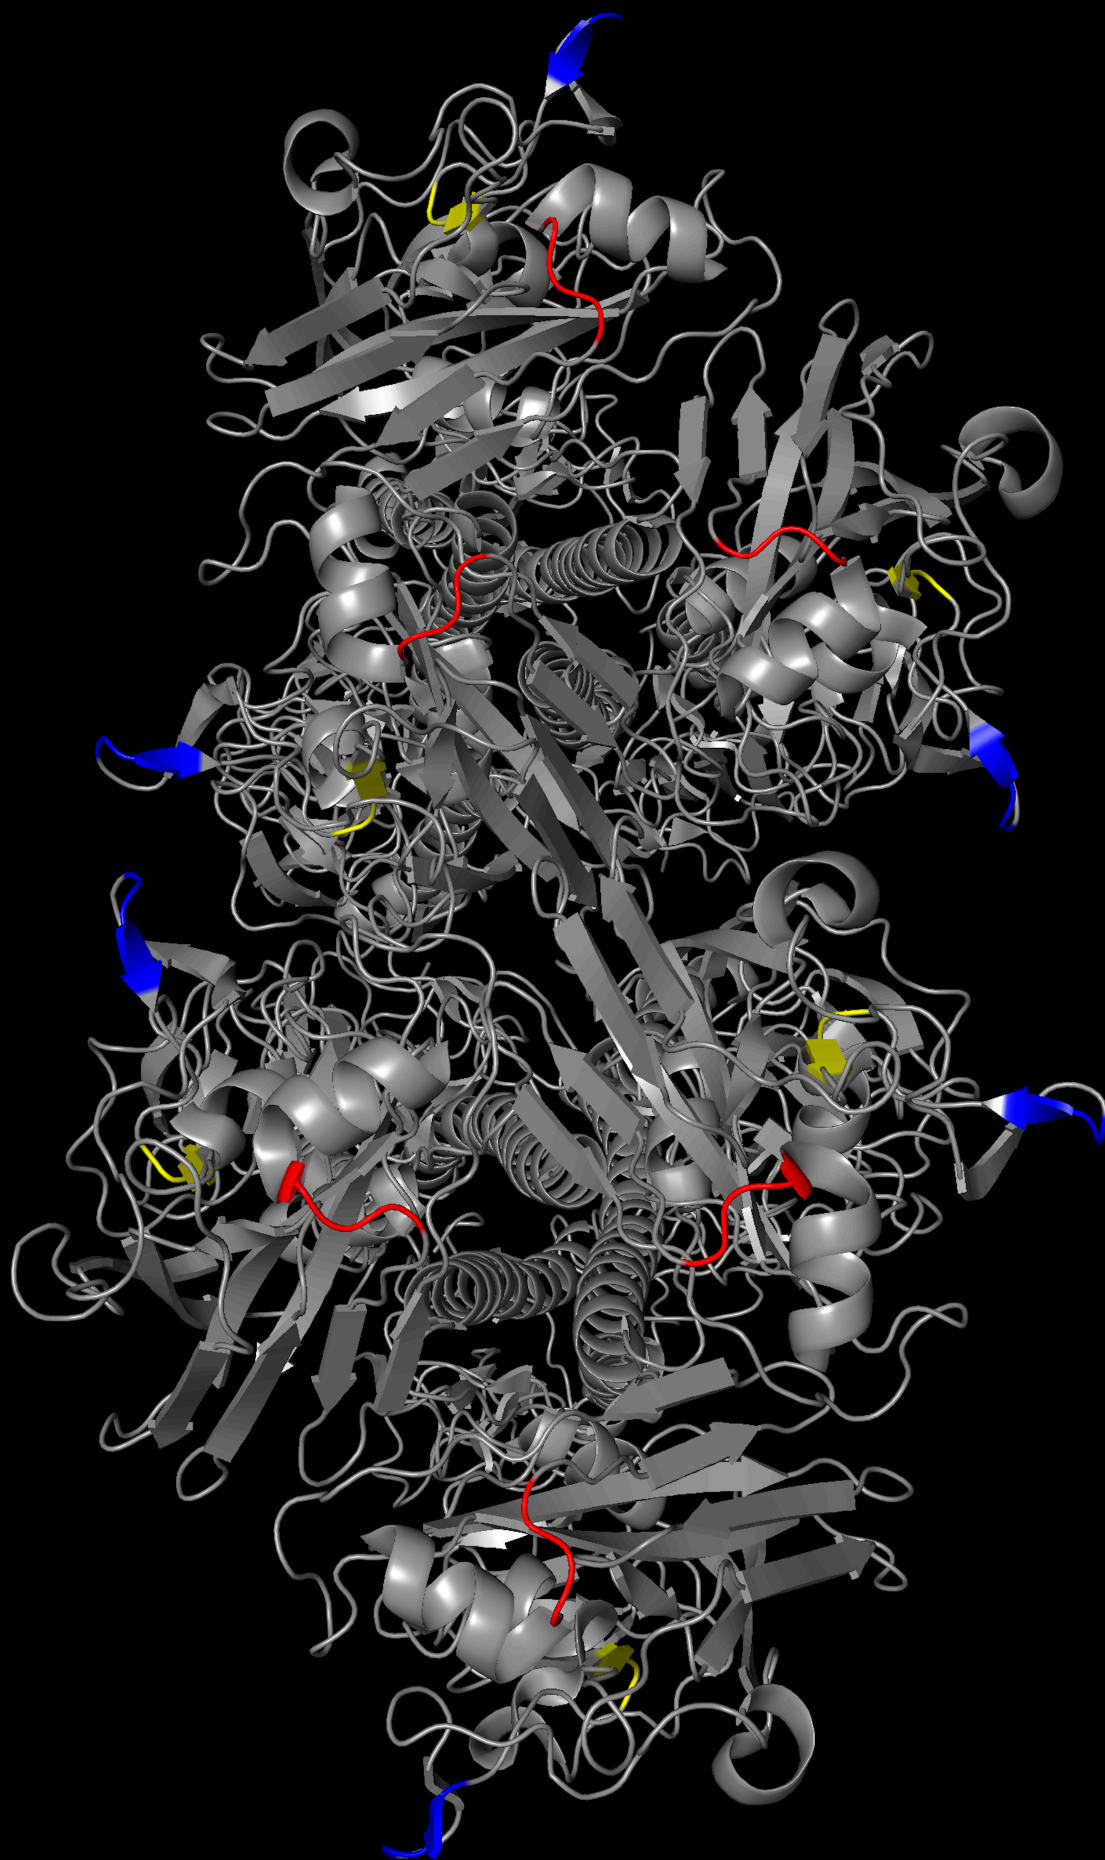

Supplement: s1 [file s1]
